# Supplementary material
Source: Royal Society of Chemistry journal article supplement (doi:10.1039/d6fo01722c)
Supplement: d6fo01722c1.pdf [file d6fo01722c1.pdf]

## Supporting information

### **Gut Microbiota–Dependent Metabolism of 6-Shogaol Generates Bioactive Metabolites That Mediate Its Anti-Inflammatory Effects**

**Shuwei Zhang<sup>1,#</sup>, Yantao Zhao<sup>1,#</sup>, Rachel C. Newsome<sup>2</sup>, Yingdong Zhu<sup>1</sup>, Christian Jobin<sup>2</sup>, Shengmin Sang<sup>1,\*</sup>**

# Contribute equally

<sup>1</sup> Laboratory for Functional Foods and Human Health, Center for Excellence in Post-Harvest Technologies, North Carolina Agricultural and Technical State University, North Carolina Research Campus, Kannapolis, NC, USA

<sup>2</sup> Department of Medicine, University of Florida, Gainesville, FL, USA.

#### **Corresponding Author:**

Shengmin Sang, Ph.D., Tel: 704-250-5710; Email: [ssang@ncat.edu](mailto:ssang@ncat.edu)

## Figure legends

**Figure S1.** Original image of Western Blot (triplicate) for **Figure 1C**.

**Figure S2.** Original image of Western Blot (triplicate) for **Figure 2D**.

**Figure S3.**  $^1\text{H}$ -NMR spectrum of **NM1** in  $\text{CD}_3\text{OD}$ .

**Figure S4.**  $^{13}\text{C}$ -NMR spectrum of **NM1** in  $\text{CD}_3\text{OD}$ .

**Figure S5.** HMBC spectrum of **NM1** in  $\text{CD}_3\text{OD}$ .

**Figure S6.**  $^1\text{H}$ -NMR spectrum of **NM2** in  $\text{CD}_3\text{OD}$ .

**Figure S7.**  $^{13}\text{C}$ -NMR spectrum of **NM2** in  $\text{CD}_3\text{OD}$ .

**Figure S8.** HSQC NMR spectrum of **NM2** in  $\text{CD}_3\text{OD}$ .

**Figure S9.**  $^1\text{H}$ - $^1\text{H}$  COSY NMR spectrum of **NM2** in  $\text{CD}_3\text{OD}$ .

**Figure S10.** HMBC spectrum of **NM2** in  $\text{CD}_3\text{OD}$ .

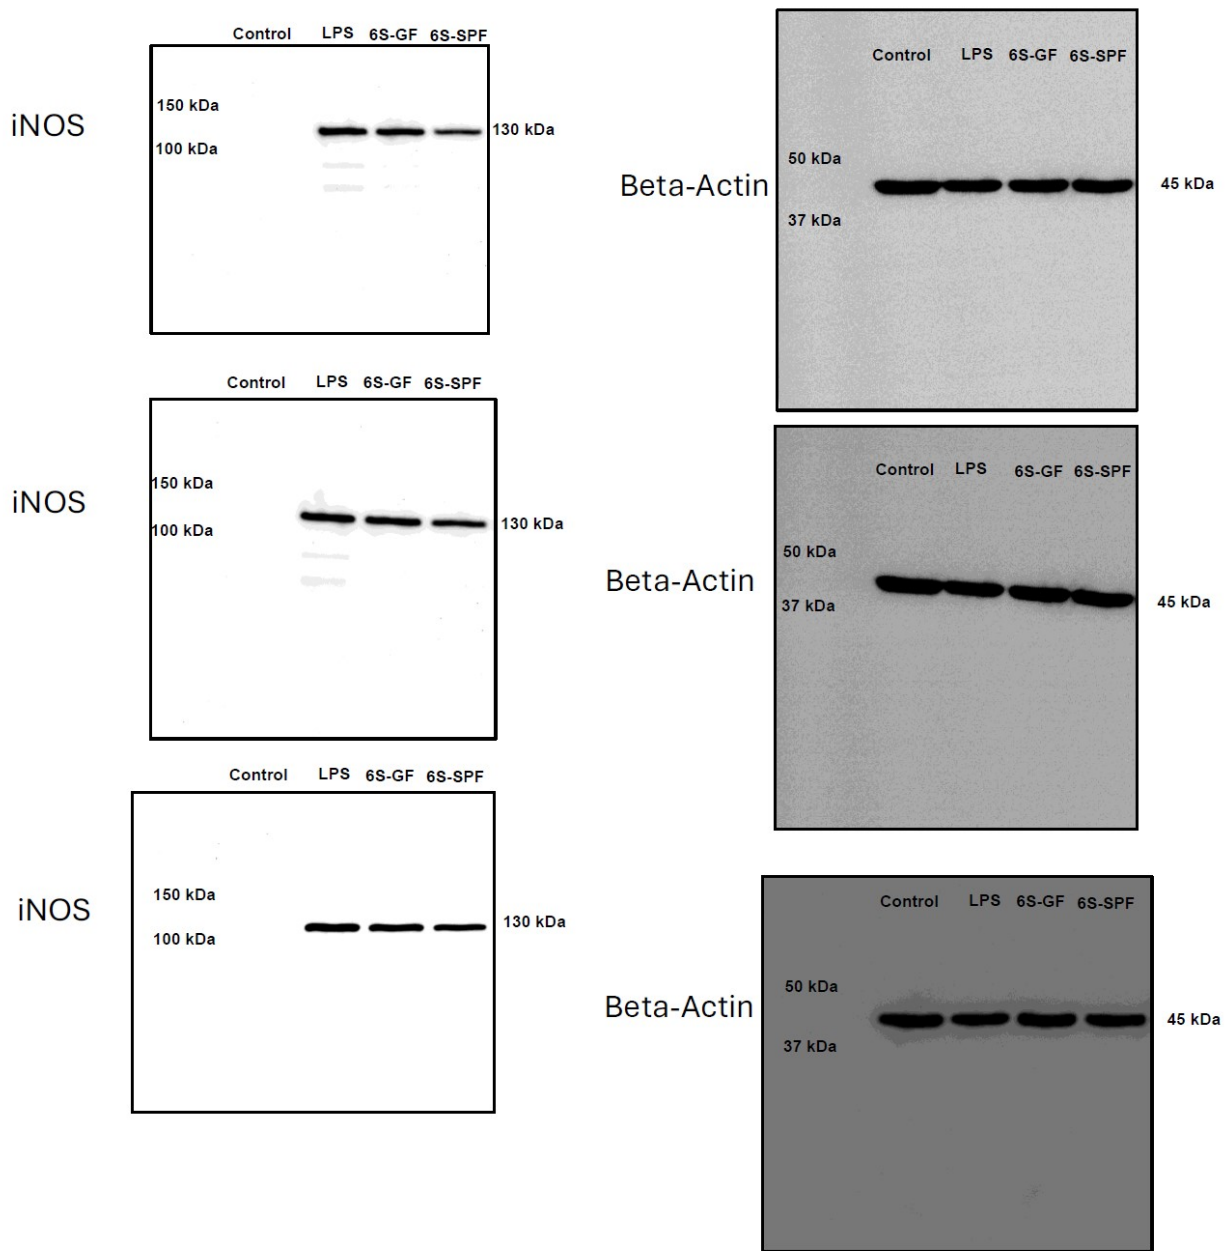

**Figure S1.** Original image of Western Blot (triplicate) for **Figure 1C**.

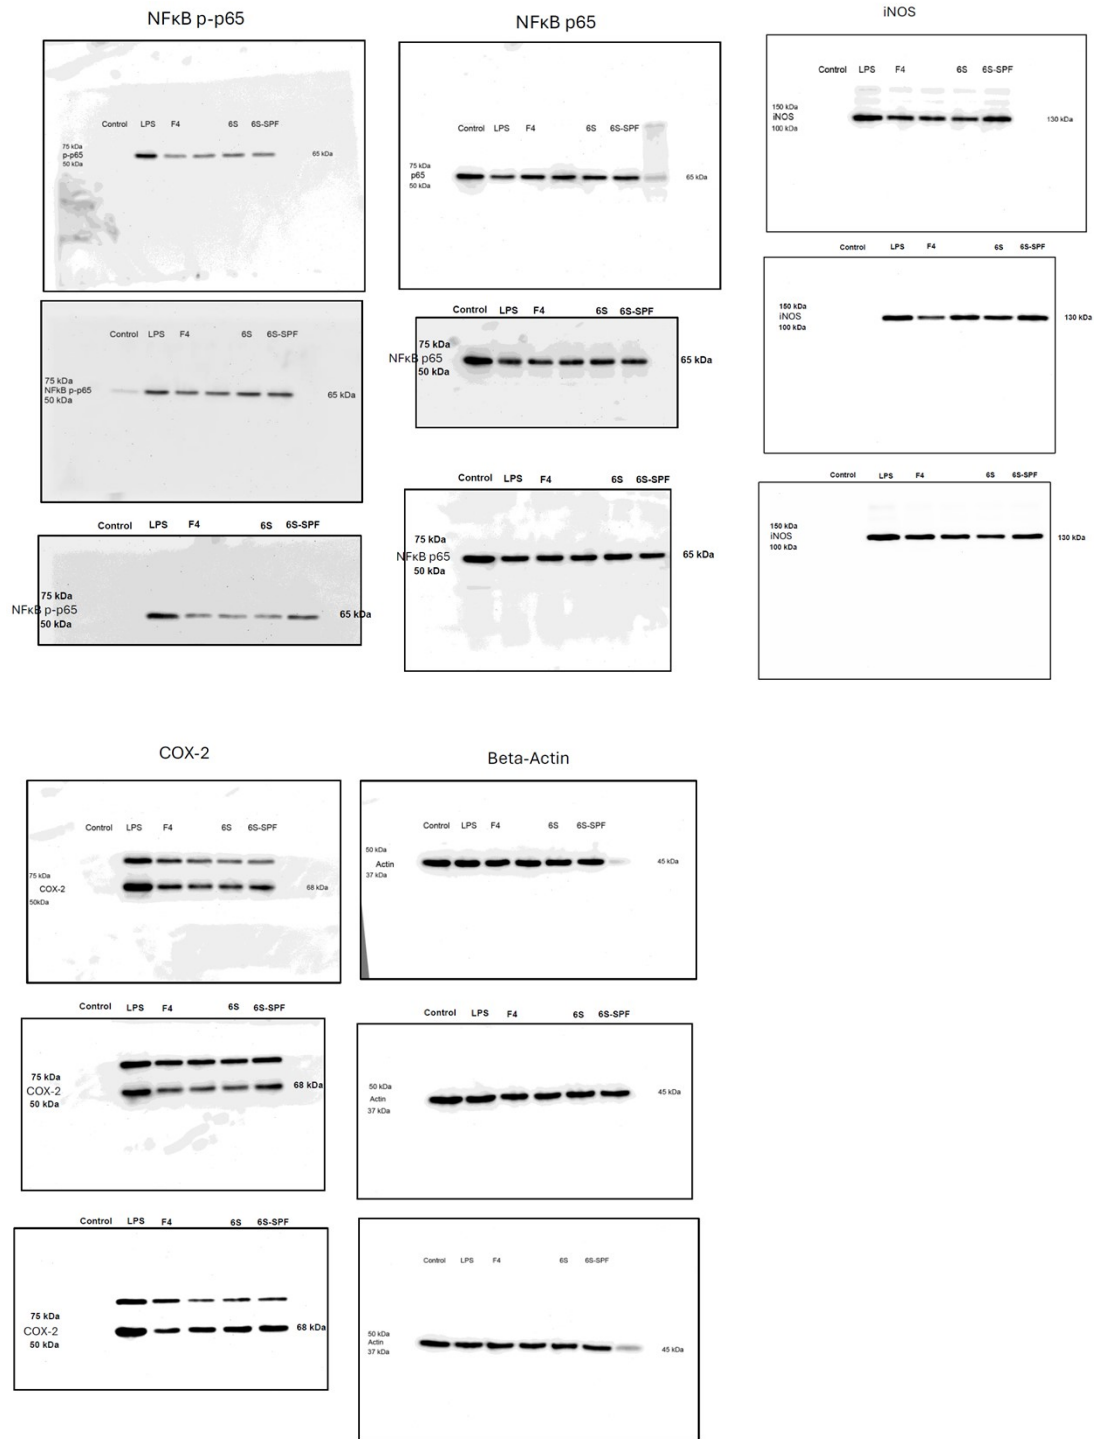

**Figure S2.** Original image of Western Blot (triplicate) for **Figure 2D**.

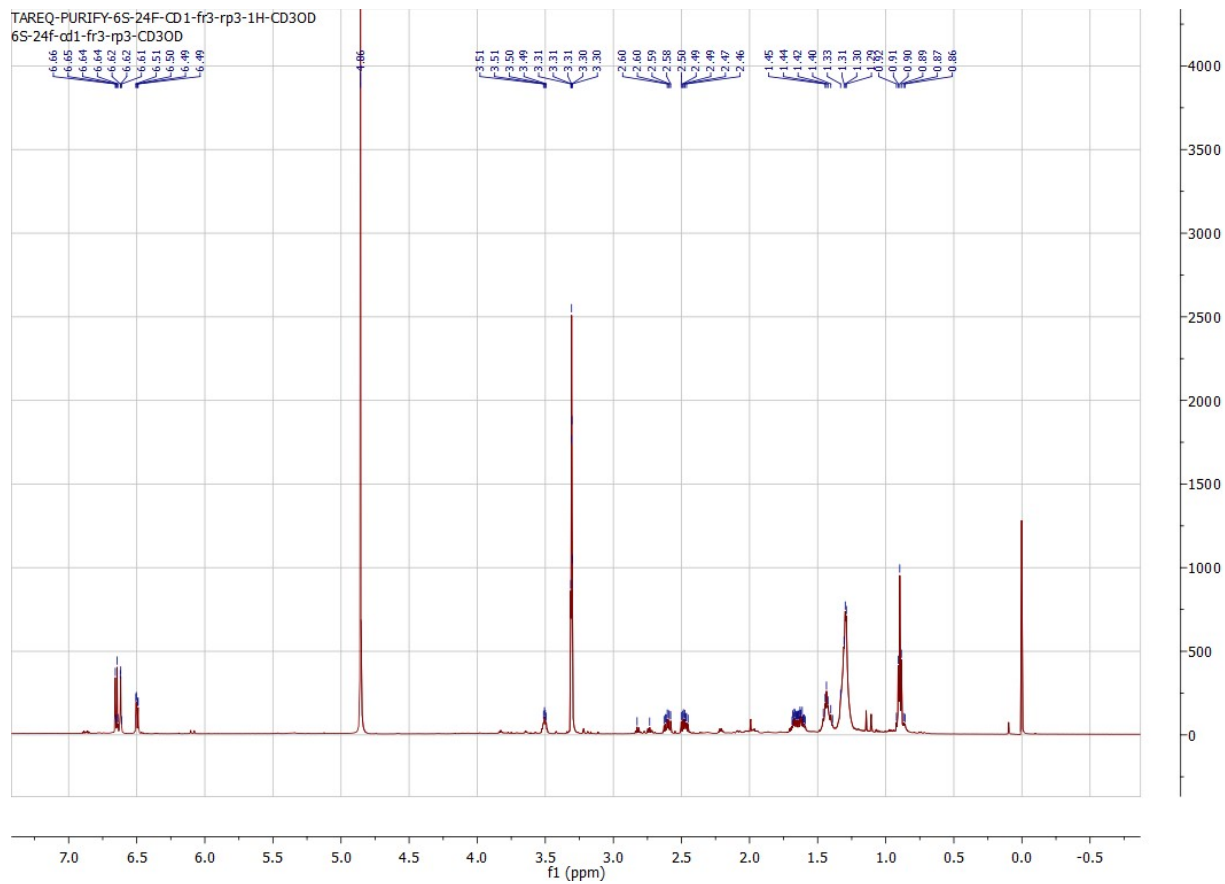

**Figure S3.**  $^1\text{H}$ -NMR spectrum of NM1 in  $\text{CD}_3\text{OD}$ .

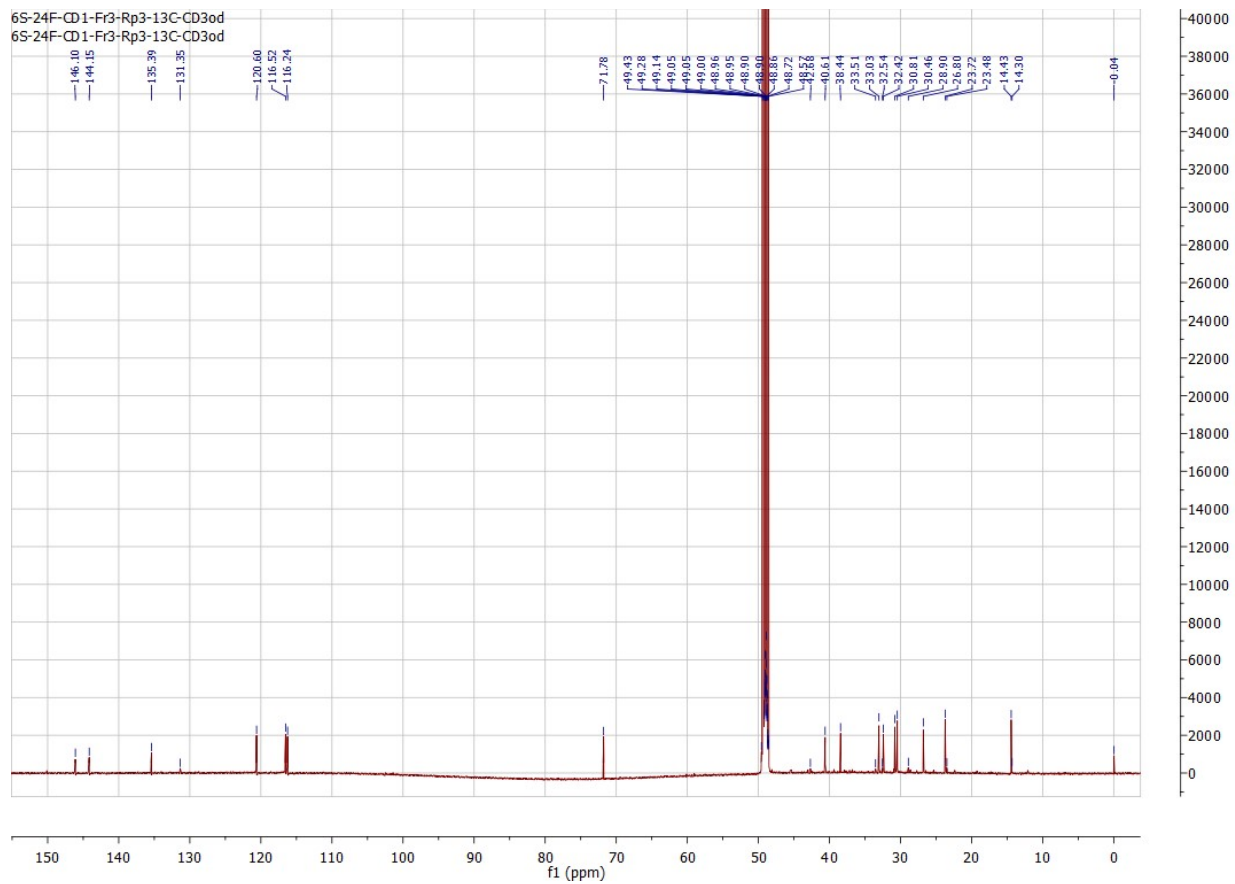

**Figure S4.**  $^{13}\text{C}$ -NMR spectrum of NM1 in  $\text{CD}_3\text{OD}$ .

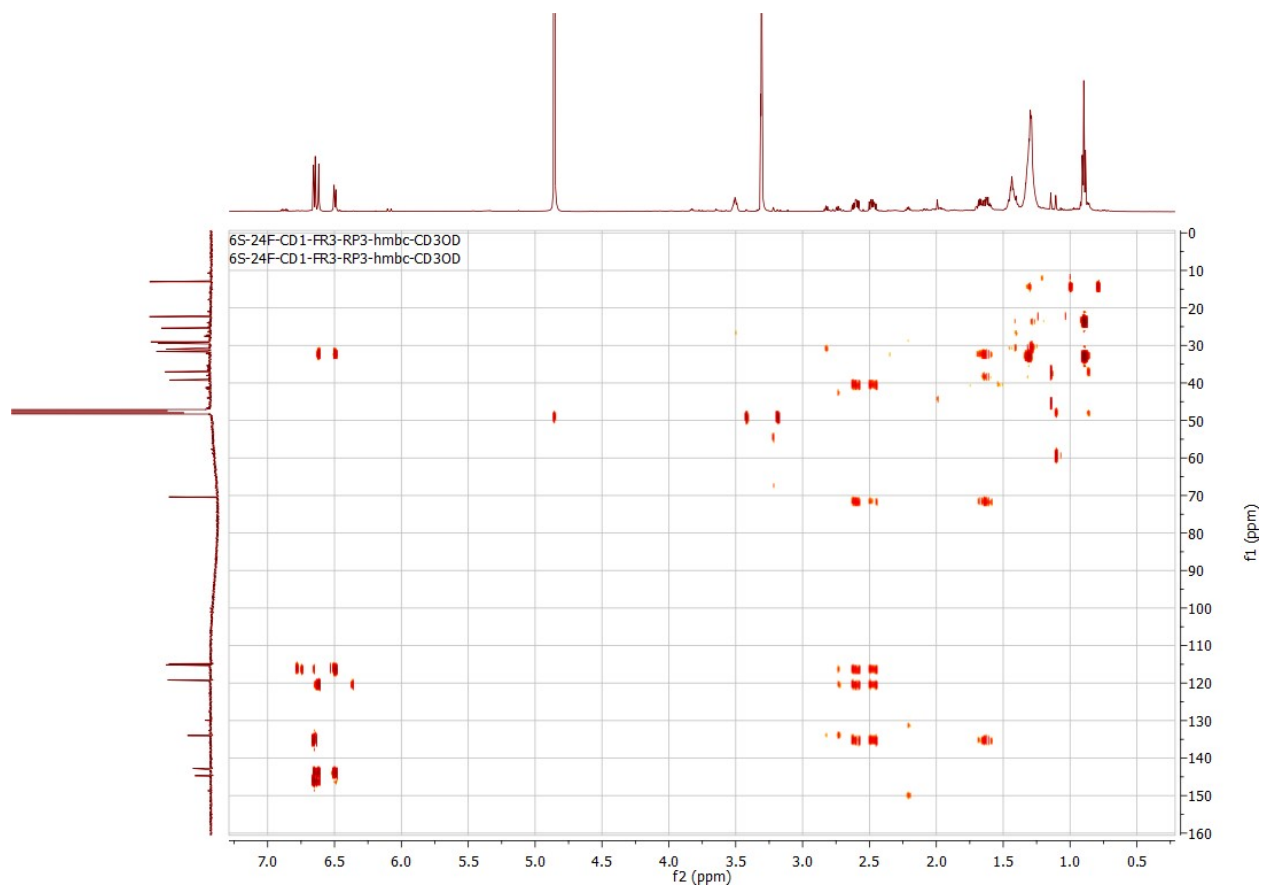

**Figure S5.** HMBC spectrum of NM1 in CD<sub>3</sub>OD.

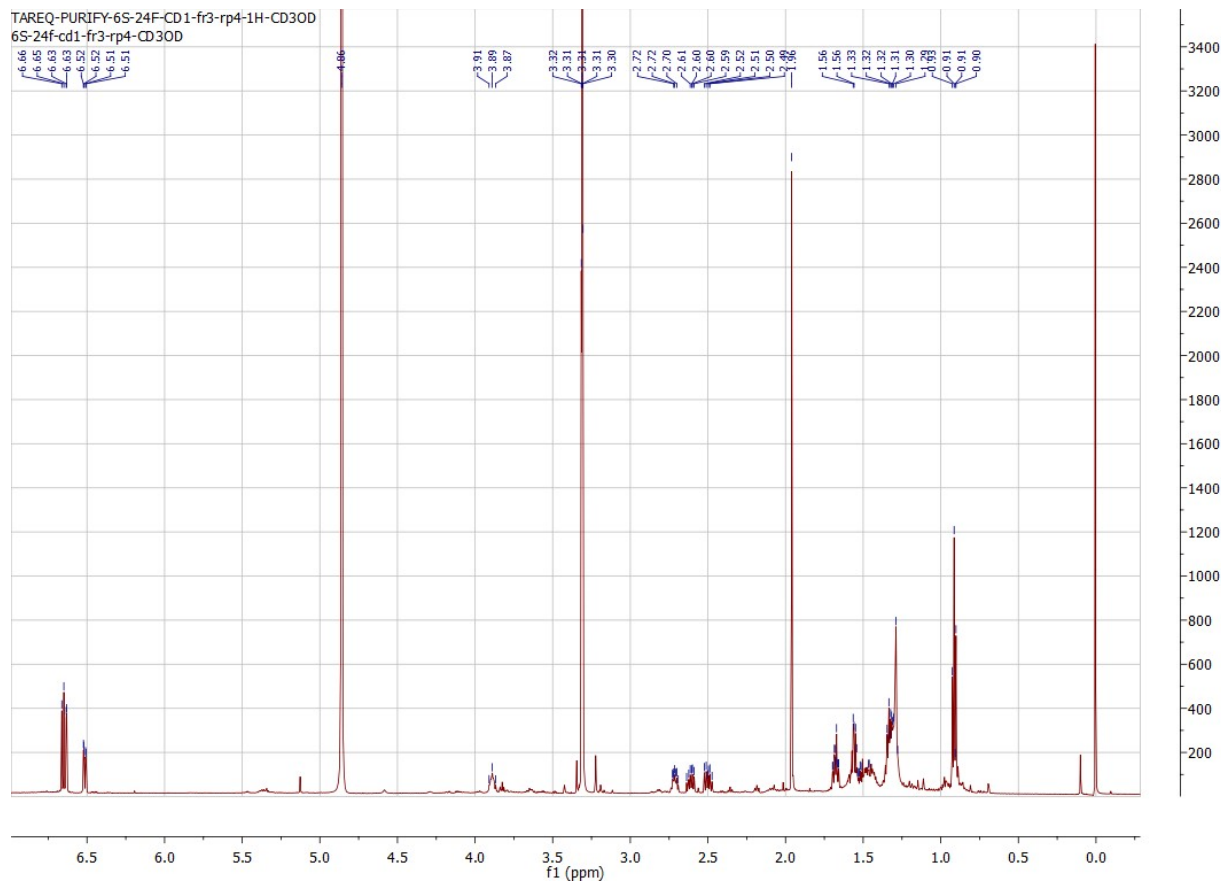

**Figure S6.**  $^1\text{H}$ -NMR spectrum of NM2 in  $\text{CD}_3\text{OD}$ .

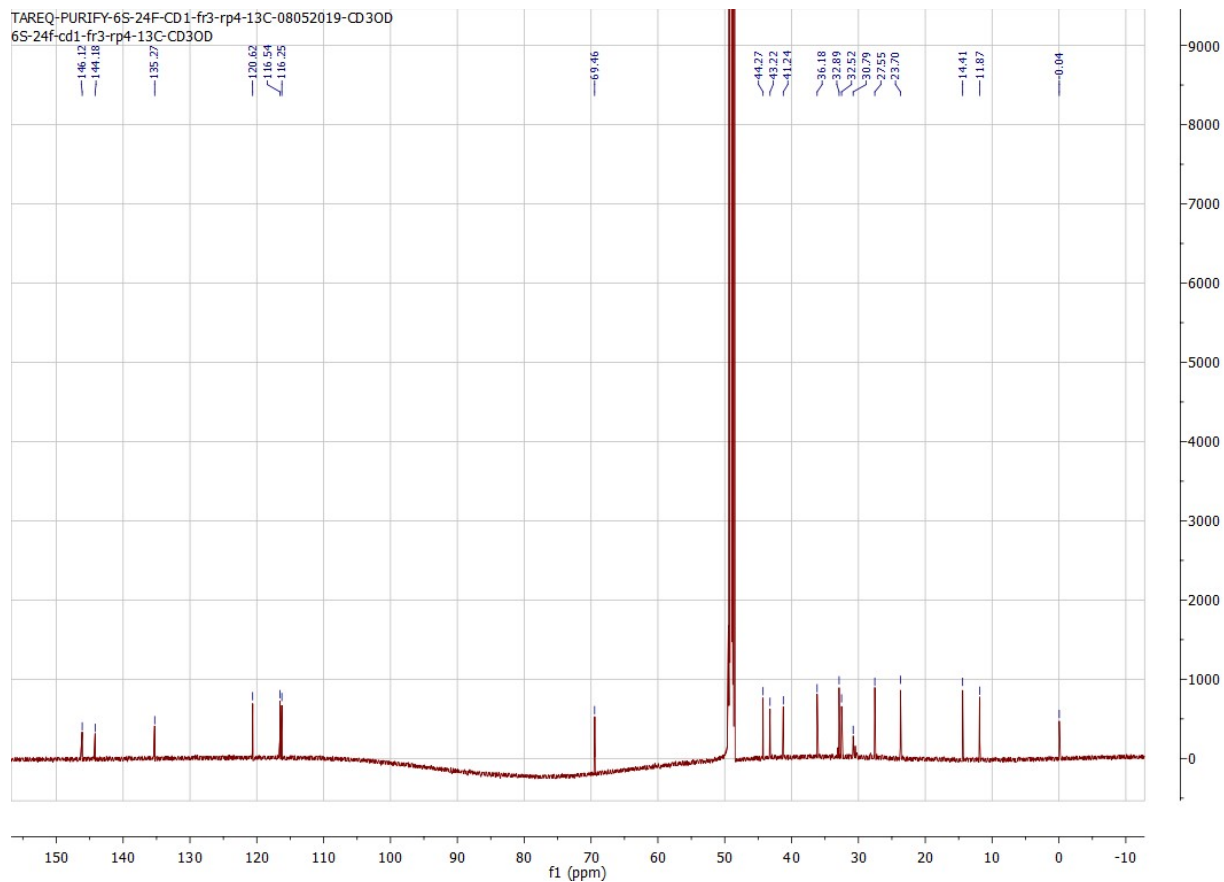

**Figure S7.**  $^{13}\text{C}$ -NMR spectrum of NM2 in  $\text{CD}_3\text{OD}$ .

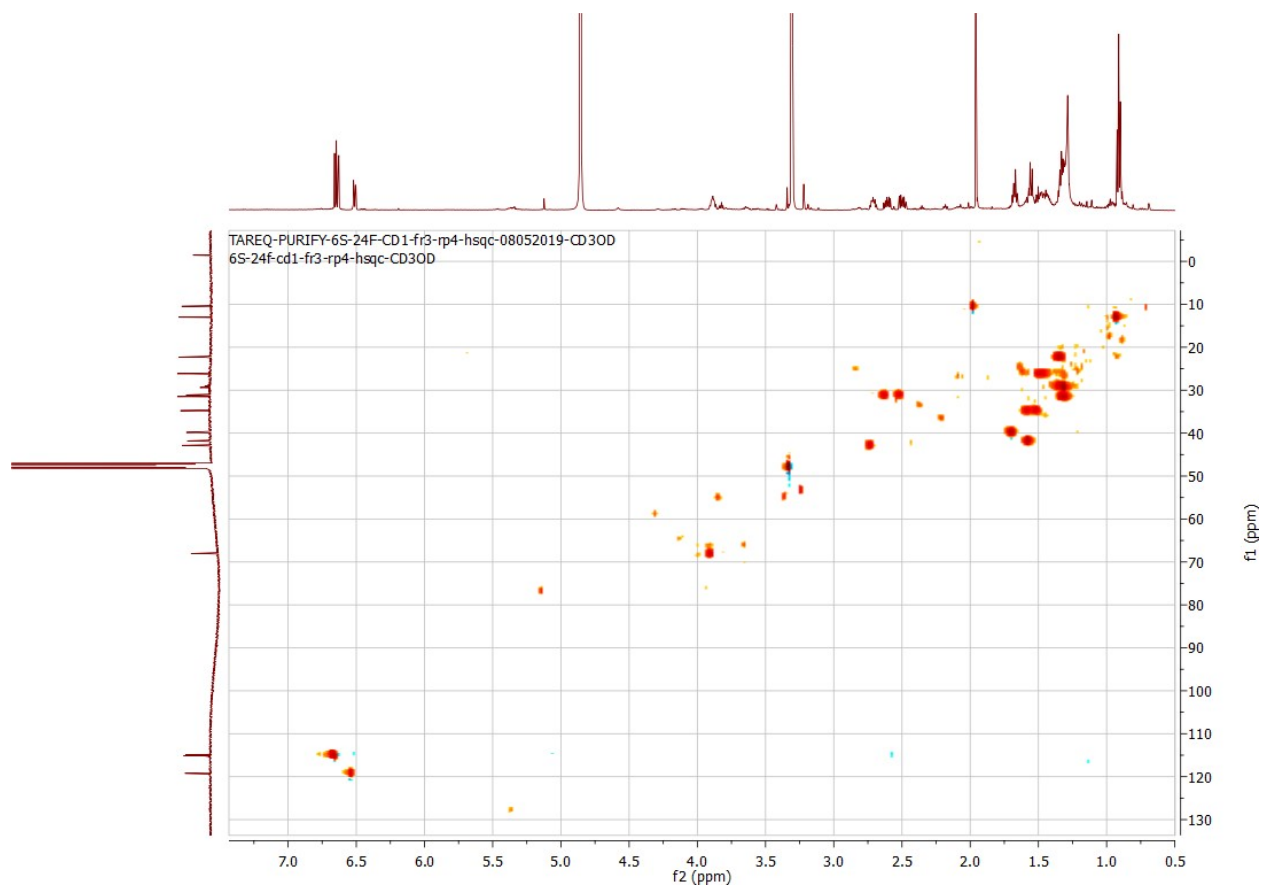

**Figure S8.** HSQC NMR spectrum of **NM2** in CD<sub>3</sub>OD.

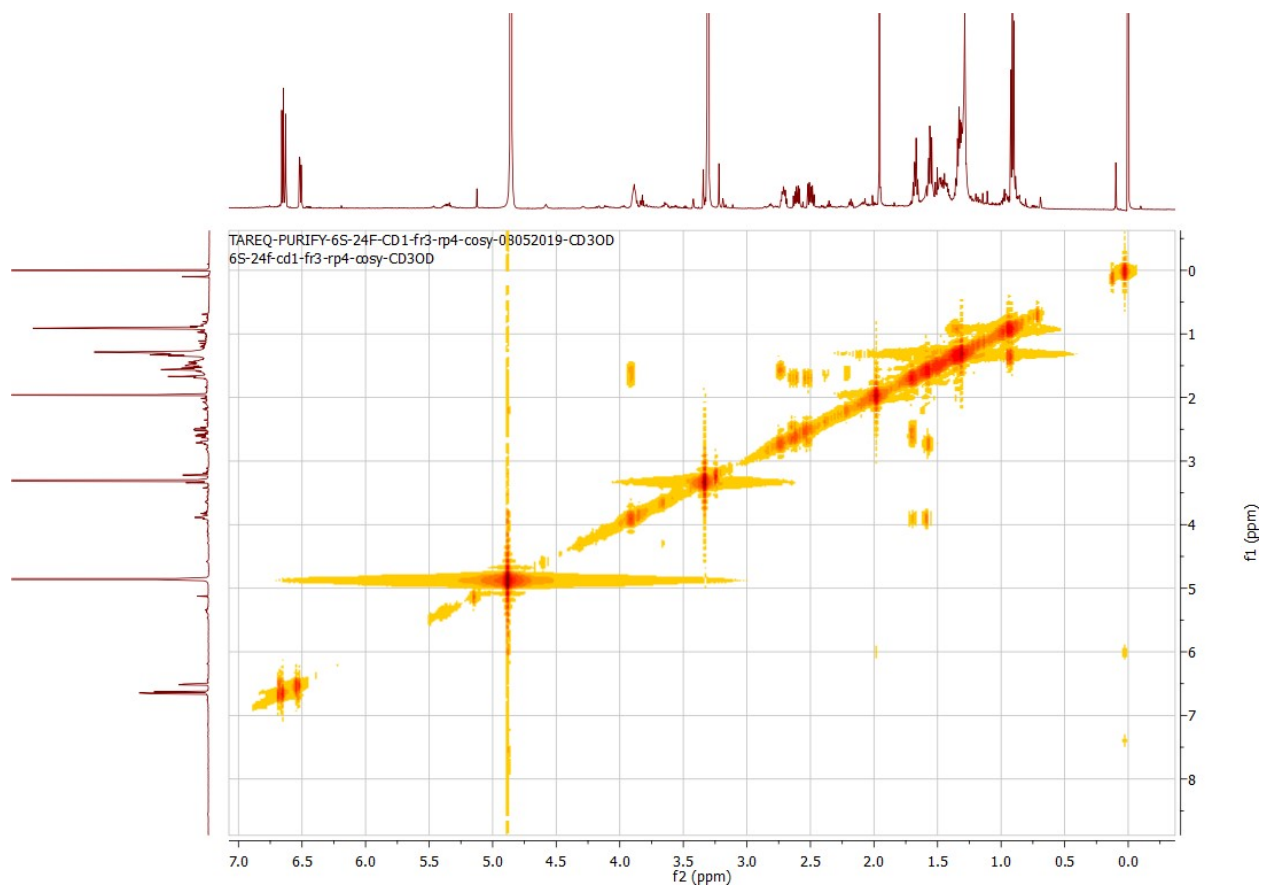

**Figure S9.**  $^1\text{H}$ - $^1\text{H}$  COSY NMR spectrum of NM2 in  $\text{CD}_3\text{OD}$ .

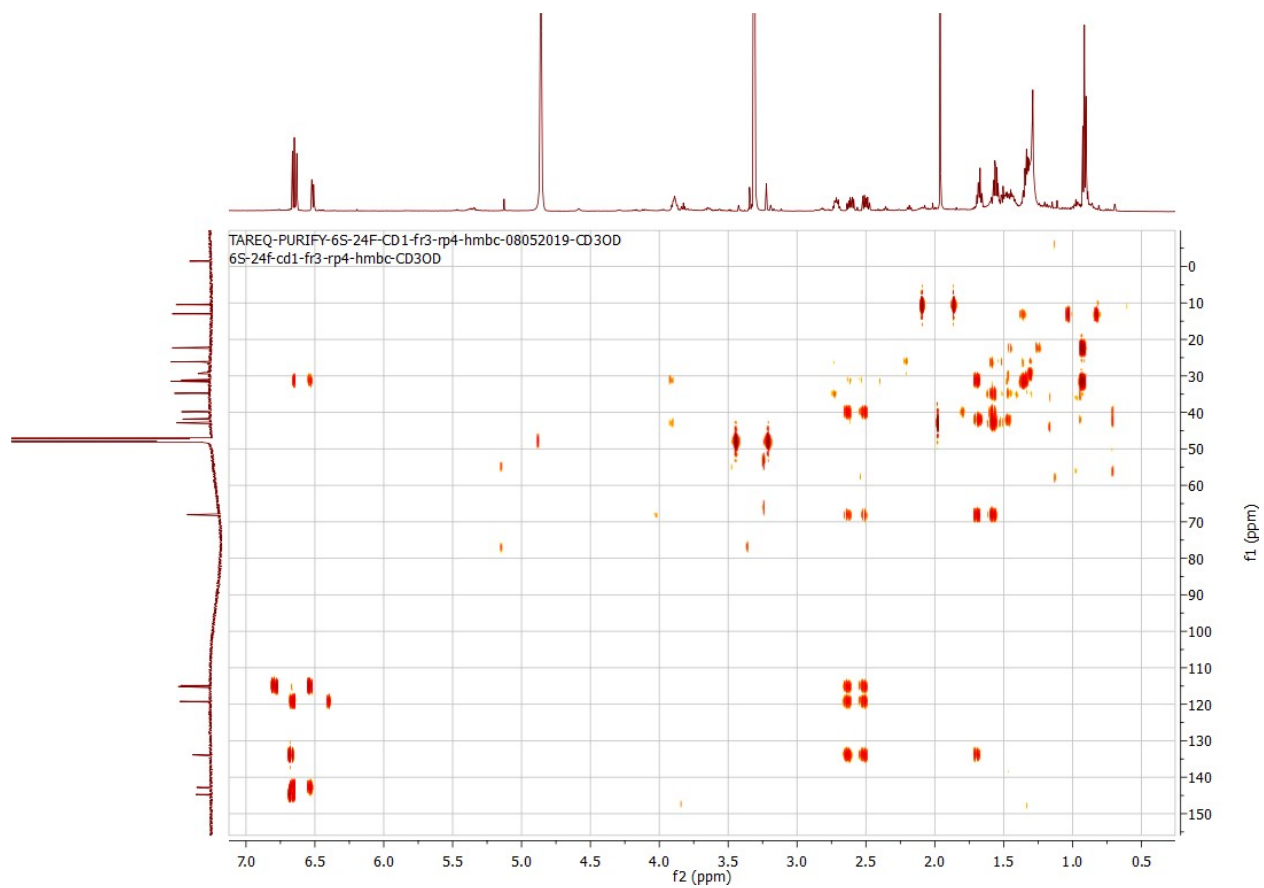

**Figure S10.** HMBC spectrum of NM2 in CD<sub>3</sub>OD.
